# Supplementary material for: Self-assembly and morphological transitions of random amphiphilic poly(β-d-glucose-co-1-octyl) phosphazenes
Source: Royal Society of Chemistry journal article supplement (doi:10.1039/c5sm01354b), 2015-01-01
Supplement: c5sm01354b1.pdf [file c5sm01354b1.pdf]

## Supporting Information

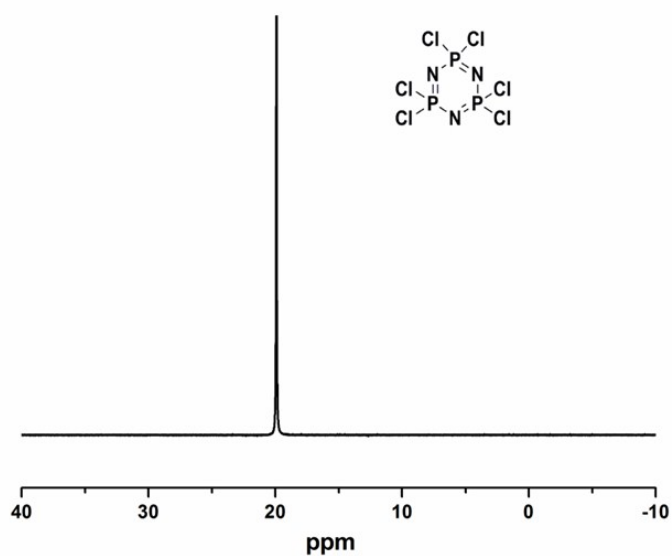

**Figure S1**  $^{31}\text{P}$  NMR of hexachlorocyclophosphazene (HCCP).

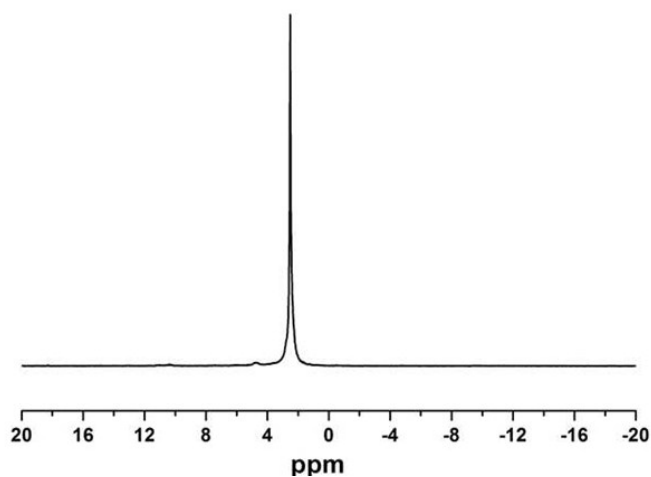

**Figure S2.**  $^{31}\text{P}$  NMR for poly[bis(allylamino)phosphazene] (PBAAP).

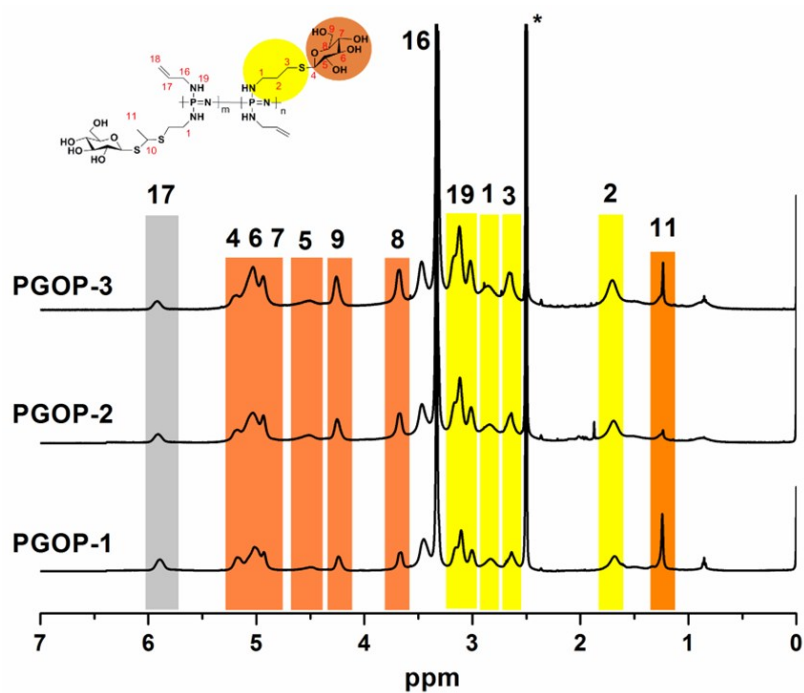

**Figure S3.**  $^1\text{H}$  NMR for glycosylated polyphosphazene.

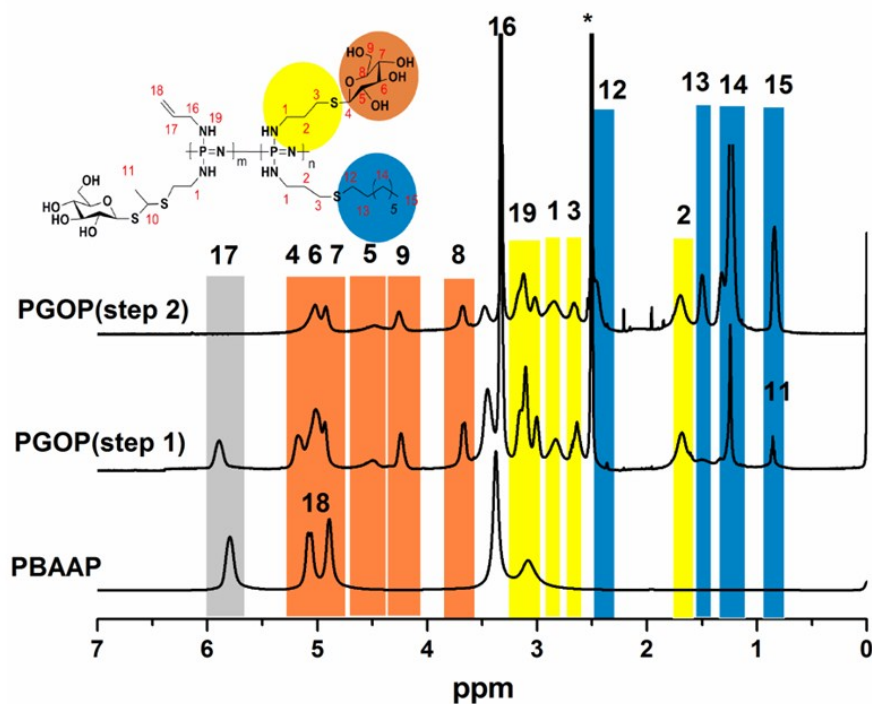

**Figure S4**  $^1\text{H}$  NMR for PBAAP, PGOP-1 after first step click reaction and PGOP-1 after second step click reaction.

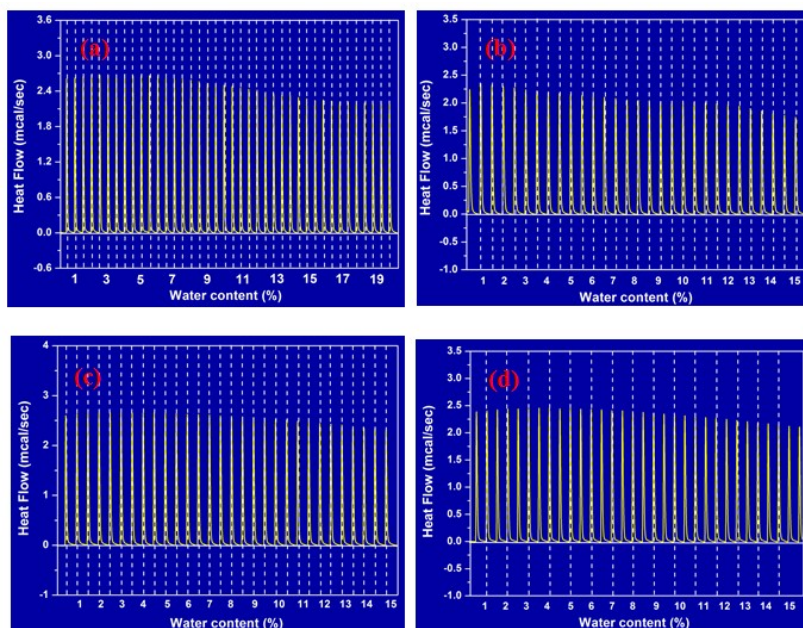

**Figure S5.** Titration heat flow of water-DMF (a), water-PGOP-1 (0.2 mg/mL) in DMF (b); water-PGOP-2 (0.2 mg/mL) in DMF (c) and water-PGOP-3 (d). The water was slowly injected into DMF solution at the rate of 0.05 wt%/s. The volume of water per injection was 0.5 wt%.
